# Supplementary material for: Two metal–organic frameworks based on a flexible benzimidazole carboxylic acid ligand: selective gas sorption and luminescence
Source: Royal Society of Chemistry journal article supplement (doi:10.1039/c7dt03363j), 2017-01-01
Supplement: c7dt03363j1.pdf [file c7dt03363j1.pdf]

## Supplementary Information

### Two metal-organic frameworks based on flexible benzimidazole carboxylic acid ligand: selective gas sorption and luminescence

Fang Zhang, Lei Hou,\* Wenyan Zhang,\* Yangtian Yan, Yunlong Wu, Ruifeng Yang, Feng Cao, and Yao-Yu Wang.

*Key Laboratory of Synthetic and Natural Functional Molecule Chemistry of the Ministry of Education, Shaanxi Key Laboratory of Physico-Inorganic Chemistry, College of Chemistry & Materials Science, Northwest University, Xi'an 7100069, P. R. China*

*Email: lhou2009@nwu.edu.cn; zhangwy@nwu.edu.cn*

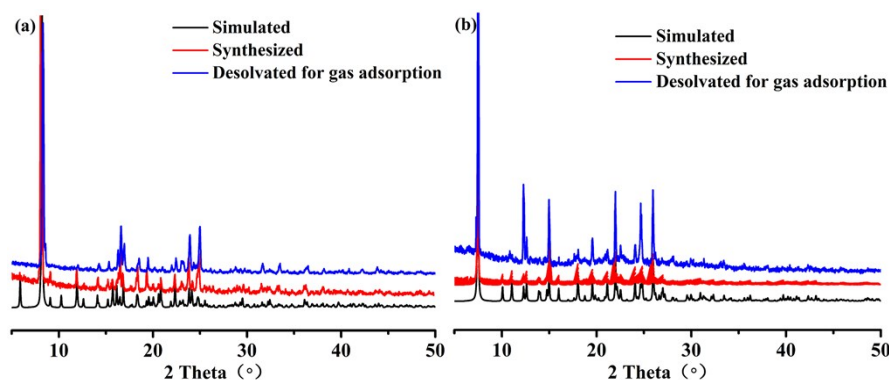

**Fig. S1** PXRD patterns of **1** (a) and **2** (b) simulated from the X-ray single-crystal structures, experimental samples and desolvated samples.

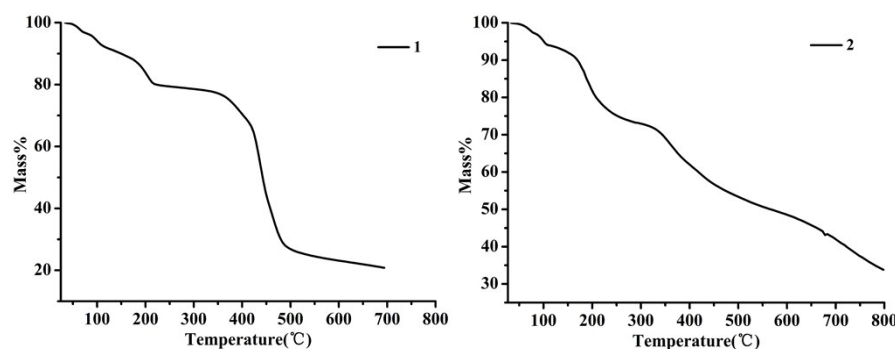

**Fig. S2** TGA plots of complexes **1** and **2**.

### IAST adsorption selectivity calculation

The experimental isotherm data for pure CO<sub>2</sub> and CH<sub>4</sub> (measured at 273 and 298 K) were fitted using a Langmuir-Freundlich (L-F) model

$$q = \frac{a * b * p^c}{1 + b * p^c}$$

Where  $q$  and  $p$  are adsorbed amounts and pressures of component  $i$ , respectively. The adsorption selectivities for binary mixtures of CO<sub>2</sub>/CH<sub>4</sub> at 273 and 298 K defined by

$$S_{ads} = (q_1 / q_2) / (p_1 / p_2)$$

Where  $q_i$  is the amount of  $i$  adsorbed and  $p_i$  is the partial pressure of  $i$  in the mixture.

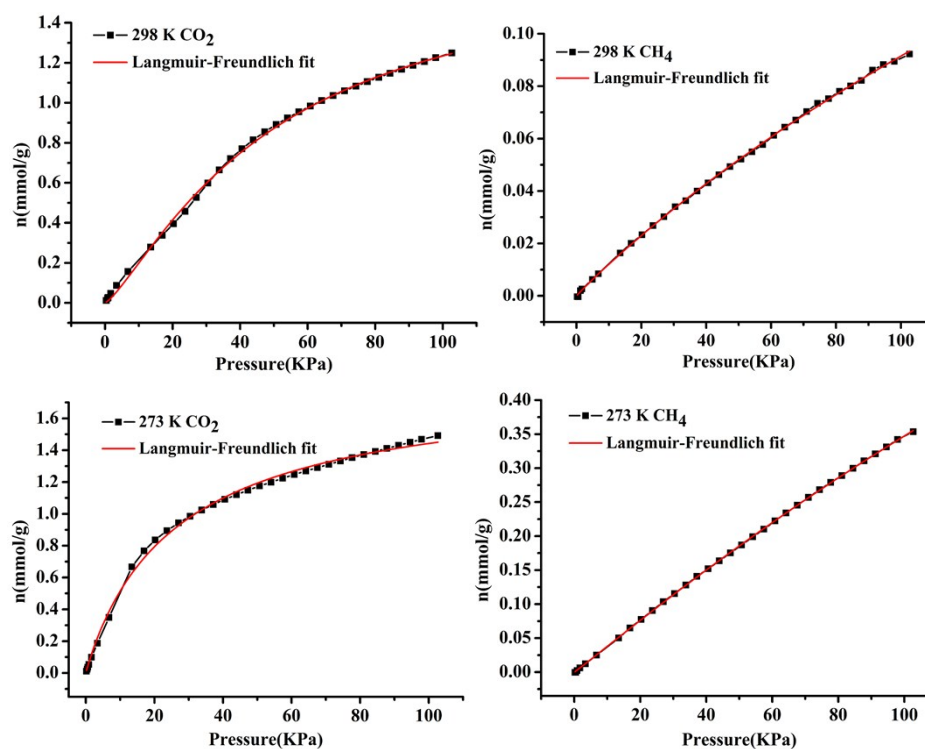

**Fig. S3** CO<sub>2</sub> adsorption isotherms of **1a** at 298K with fitting by L-F model:  $a = 1.74802$ ,  $b = 0.00689$ ,  $c = 1.27132$ ,  $\text{Chi}^2 = 2.0513 \times 10^{-4}$ ,  $R^2 = 0.99882$ ; CH<sub>4</sub> adsorption isotherms of **1a** at 298K with fitting by L-F model:  $a = 0.46111$ ,  $b = 0.00292$ ,  $c = 0.96391$ ,  $\text{Chi}^2 = 3.05 \times 10^{-7}$ ,  $R^2 = 0.99966$ ; CO<sub>2</sub> adsorption isotherms of **1a** at 273K with fitting by L-F model:  $a = 1.85073$ ,  $b = 0.04204$ ,  $c = 0.96216$ ,  $\text{Chi}^2 = 5.79 \times 10^{-4}$ ,  $R^2 = 0.99756$ ; CH<sub>4</sub> adsorption isotherms of **1a** at 273K with fitting by L-F model:  $a = 2.07327$ ,  $b = 0.00172$ ,  $c = 1.03366$ ,  $\text{Chi}^2 = 7.07 \times 10^{-7}$ ,  $R^2 = 0.99995$ .

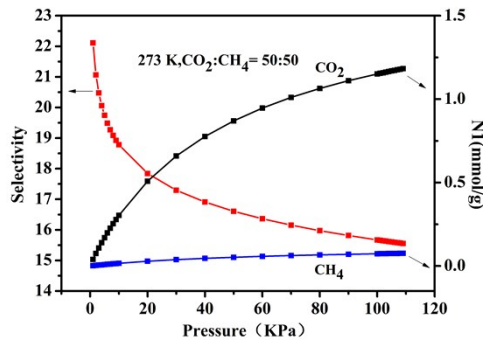

**Fig. S4** IAST adsorption selectivity of **1a** for the CO<sub>2</sub>/CH<sub>4</sub> mixtures with components of 50:50 at 273 K.

### Calculation of Sorption Heat for CO<sub>2</sub> Uptake Using Virial 2 Model

$$\ln P = \ln N + 1/T \sum_{i=0}^m a_i N^i + \sum_{i=0}^n b_i N^i \quad Q_{st} = -R \sum_{i=0}^m a_i N^i$$

The above virial expression was used to fit the combined isotherm data for **1a** at 273, 298 K, where  $P$  is the pressure,  $N$  is the adsorbed amount,  $T$  is the temperature,  $a_i$  and  $b_i$  are virial coefficients, and  $m$  and  $n$  are the number of coefficients used to describe the isotherms.  $Q_{st}$  is the coverage-dependent enthalpy of adsorption and  $R$  is the universal gas constant.

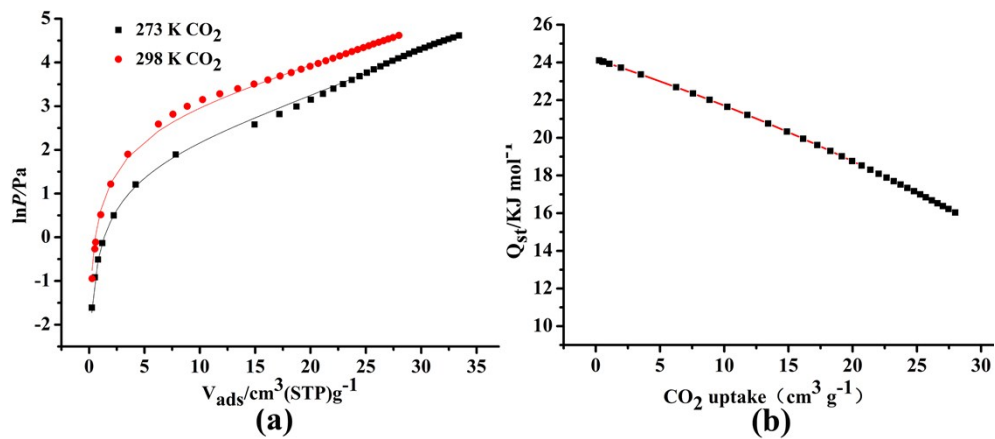

**Fig. S5** (a) Virial analysis of the CO<sub>2</sub> adsorption data at 273 and 298 K for **1a**. Fitting results:  $a_0 = -2906.84$ ,  $a_1 = 26.51$ ,  $a_2 = 0.30$ ,  $a_3 = 0$ ,  $a_4 = 0$ ,  $\chi^2 = 0.00596$ ,  $R^2 = 0.99788$ . (b) Isosteric heat of CO<sub>2</sub> adsorption for **1a** estimated by the virial equation from the adsorption isotherms at 273 and 298 K.

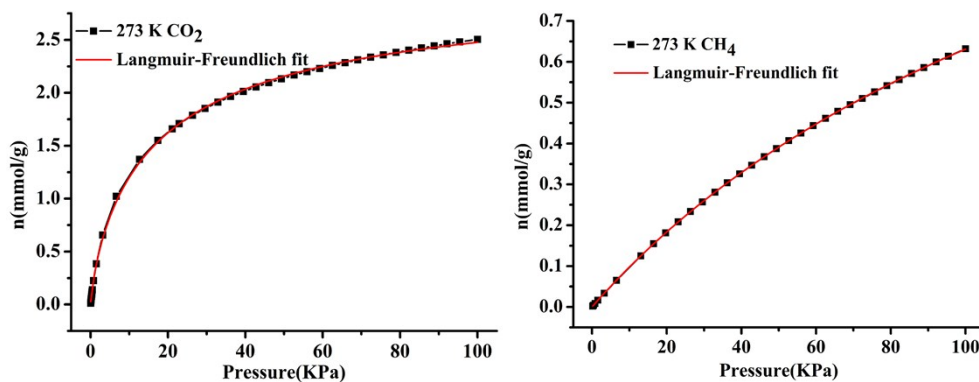

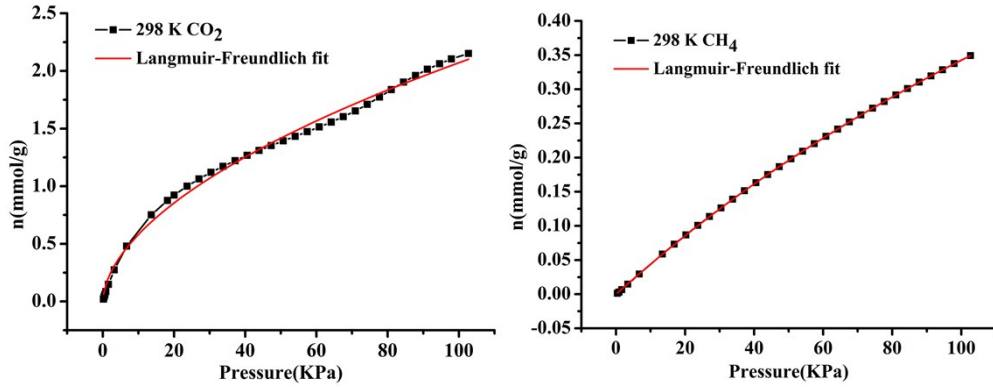

**Fig. S6** CO<sub>2</sub> adsorption isotherms of **2a** at 298K with fitting by L-F model:  $a=75.55824$ ,  $b = 0.00213$ ,  $c = 0.56069$ ,  $\text{Chi}^2=2.59 \times 10^{-3}$ ,  $R^2 = 0.99399$ ; CH<sub>4</sub> adsorption isotherms of **2a** at 298K with fitting by L-F model:  $a = 1.31743$ ,  $b = 0.00339$ ,  $c = 1.00758$ ,  $\text{Chi}^2= 1.28 \times 10^{-7}$ ,  $R^2 = 0.99999$ ; CO<sub>2</sub> adsorption isotherms of **2a** at 273K with fitting by L-F model:  $a = 3.10526$ ,  $b = 0.10093$ ,  $c = 0.79582$ ,  $\text{Chi}^2 = 3.76 \times 10^{-4}$ ,  $R^2 = 0.99958$ ; CH<sub>4</sub> adsorption isotherms of **2a** at 273K with fitting by L-F model:  $a = 1.66684$ ,  $b = 0.00637$ ,  $c = 0.99014$ ,  $\text{Chi}^2= 1.86 \times 10^{-7}$ ,  $R^2 = 1$ .

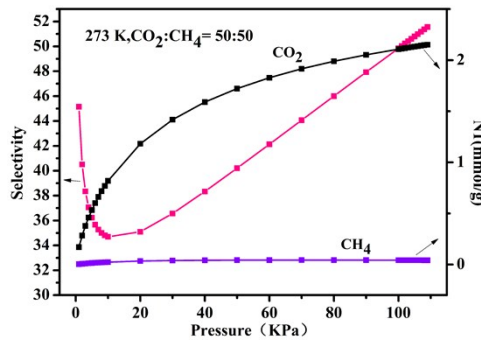

**Fig. S7** IAST adsorption selectivity of **2a** for the CO<sub>2</sub>/CH<sub>4</sub> mixtures with different components at 273K.

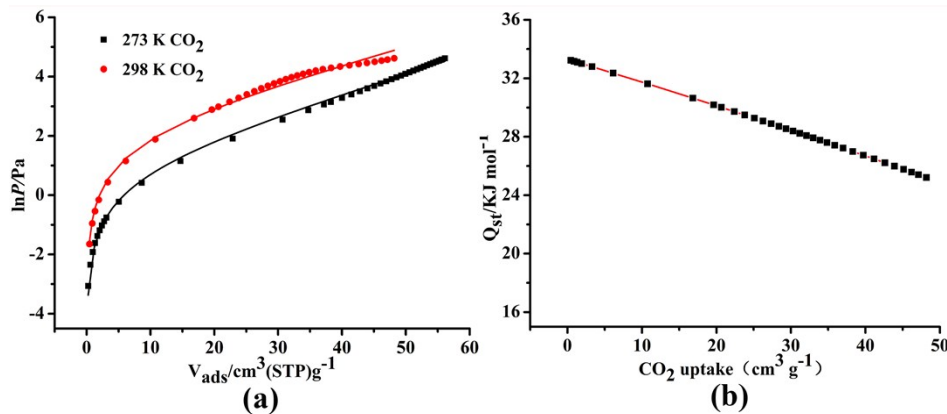

**Fig. S8** (a) Virial analysis of the CO<sub>2</sub> adsorption data at 273K and 298 K for **2a**. Fitting results:  $a_0=-4004.85$ ,  $a_1 = 18.31$ ,  $a_2 = 0.0389$ ,  $a_3 = 0$ ,  $a_4 = 0$ ,  $\text{Chi}^2 = 0.01242$ ,  $R^2 = 0.99748$ . (b) Isosteric heat of CO<sub>2</sub> adsorption for **2a** estimated by the virial equation from the adsorption isotherms at 273 and 298 K.

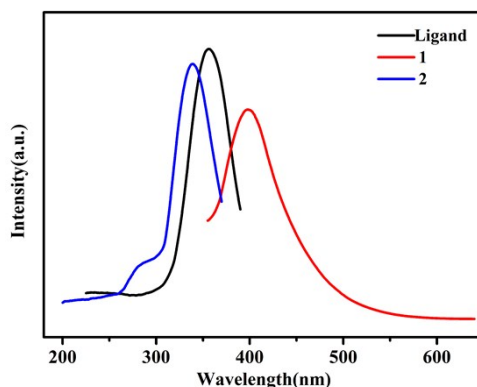

**Fig. S9** Solid-state excitation spectra of H<sub>4</sub>L ligand, **1** and **2**.

**Table S1** Selected bond lengths (Å) and bond angles (°) for **1** and **2**.

| Complex 1                                                                                                               |          |                     |          |
|-------------------------------------------------------------------------------------------------------------------------|----------|---------------------|----------|
| Cd(1)-O(1)                                                                                                              | 2.534(6) | O(4)#1-Cd(1)-N(2)#3 | 101.0(2) |
| Cd(1)-O(1W)                                                                                                             | 2.346(6) | O(8)#2-Cd(1)-O(1)   | 94.6(2)  |
| Cd(1)-O(2)                                                                                                              | 2.330(6) | O(8)#2-Cd(1)-O(1W)  | 85.0(2)  |
| Cd(1)-O(4)#1                                                                                                            | 2.282(6) | O(8)#2-Cd(1)-O(2)   | 146.2(2) |
| Cd(1)-O(8)#2                                                                                                            | 2.304(6) | N(2)#3-Cd(1)-O(1)   | 96.2(2)  |
| Cd(1)-N(2)#3                                                                                                            | 2.288(6) | N(2)#3-Cd(1)-O(1W)  | 173.2(2) |
| Cd(2)-O(2W)                                                                                                             | 2.333(6) | N(2)#3-Cd(1)-O(2)   | 100.3(2) |
| Cd(2)-O(6)#4                                                                                                            | 2.189(5) | N(2)#3-Cd(1)-O(8)#2 | 91.2(2)  |
| Cd(2)-O(7)#5                                                                                                            | 2.157(5) | O(6)#4-Cd(2)-O(2W)  | 91.0(2)  |
| Cd(2)-O(9)                                                                                                              | 2.315(8) | O(6)#4-Cd(2)-O(9)   | 83.6(3)  |
| Cd(2)-N(4)                                                                                                              | 2.246(6) | O(6)#4-Cd(2)-N(4)   | 113.1(2) |
| O(1W)-Cd(1)-O(1)                                                                                                        | 78.5(2)  | O(7)#5-Cd(2)-O(2W)  | 92.9(2)  |
| O(2)-Cd(1)-O(1)                                                                                                         | 52.8(2)  | O(7)#5-Cd(2)-O(6)#4 | 124.8(2) |
| O(2)-Cd(1)-O(1W)                                                                                                        | 80.1(2)  | O(7)#5-Cd(2)-O(9)   | 88.7(3)  |
| O(4)#1-Cd(1)-O(1)                                                                                                       | 162.5(2) | O(7)#5-Cd(2)-N(4)   | 120.5(2) |
| O(4)#1-Cd(1)-O(1W)                                                                                                      | 84.1(2)  | O(9)-Cd(2)-O(2W)    | 174.2(3) |
| O(4)#1-Cd(1)-O(2)                                                                                                       | 125.6(2) | N(4)-Cd(2)-O(2W)    | 98.5(2)  |
| O(4)#1-Cd(1)-O(8)#2                                                                                                     | 82.3(2)  | N(4)-Cd(2)-O(9)     | 85.4(3)  |
| Symmetry codes: #1 -x+1, -y+3, -z+1; #2 -x, -y+2, -z+1; #3 -x, -y+3, -z+1; #4 -x, -y, -z+2; #5 x+1, y, z; #6 x-1, y, z. |          |                     |          |
| Complex 2                                                                                                               |          |                     |          |
| Zn(1)-O(2)#1                                                                                                            | 1.925(5) | O(2)#1-Zn(1)-O(1W)  | 94.6(3)  |
| Zn(1)-N(1)                                                                                                              | 1.976(6) | N(1)-Zn(1)-O(1W)    | 100.9(3) |
| Zn(1)-O(3)#2                                                                                                            | 1.900(5) | O(3)#2-Zn(1)-O(2)#1 | 119.3(2) |
| Zn(1)-O(1W)                                                                                                             | 2.006(6) | O(3)#2-Zn(1)-N(1)   | 118.2(2) |
| O(2)#1-Zn(1)-N(1)                                                                                                       | 115.3(2) | O(3)#2-Zn(1)-O(1W)  | 101.4(3) |
| Symmetry codes: #1 -x+1, -y+2, -z; #2 x, -y+3/2, z-1/2; #3 -x+2, -y+1, -z; #4 x, -y+3/2, z+1/2.                         |          |                     |          |
